# Supplementary material for: Small molecule-induced cellular conversion
Source: Royal Society of Chemistry journal article supplement (doi:10.1039/c7cs00330g), 2017-01-01
Supplement: c7cs00330g1.pdf [file c7cs00330g1.pdf]

# **Supplementary Information**

## **Small molecule-induced cellular conversion**

Debojyoti De,<sup>a,+</sup> Debasish Halder,<sup>b,+</sup> Injae Shin,<sup>b,\*</sup> Kyeong Kyu Kim<sup>a,\*</sup>

<sup>a,\*</sup>Department of Molecular Cell Biology, Sungkyunkwan University School of Medicine, Suwon 16419, Korea. E-mail: [kyeongkyu@skku.edu](mailto:kyeongkyu@skku.edu).

<sup>b,\*</sup>Department of Chemistry, Yonsei University, Seoul 03722, Korea. E-mail: [injae@yonsei.ac.kr](mailto:injae@yonsei.ac.kr).

<sup>+</sup>Two authors contribute equally to this work.

<sup>\*</sup>co-correspondence

### Contents

1. Supplementary Figure S1
2. Supplementary Table S1

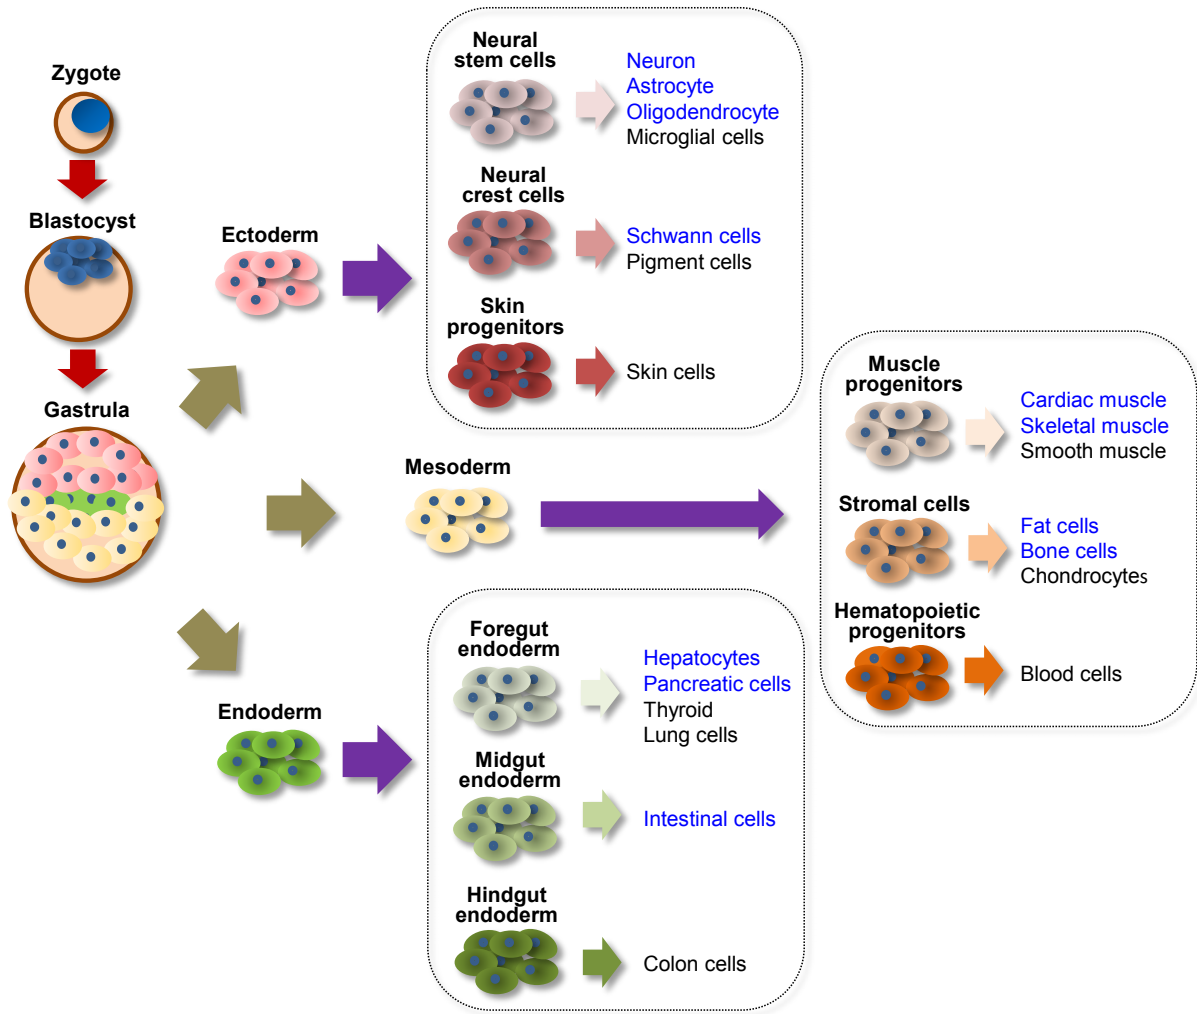

**Supplementary Figure S1.** A simplified scheme of differentiation of three germ layers into their subsequent lineages. We have considered only some popular cell types and their differentiation traces to give an insight into the cellular conversion. Lineages depicted in blue color are those mentioned in this review.

**Supplementary Table S1.** Summary of small molecules, described in this review, that induce cell conversion.

| Name                           | Structure                                                                           | Target                                                        | Use and Comments                                                                                                                 | References and Figure <sup>a</sup>                                      |
|--------------------------------|-------------------------------------------------------------------------------------|---------------------------------------------------------------|----------------------------------------------------------------------------------------------------------------------------------|-------------------------------------------------------------------------|
| A83-01                         | 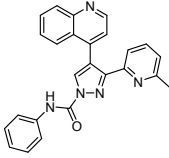   | An inhibitor of TGF- $\beta$ type 1 receptor ALK4/5/7         | Used for converting fibroblasts into neural stem-like cells and cardiac cells.                                                   | Neural stem-like cells: Fig 12; ref 33<br>Cardiogenesis: Fig 14; ref 38 |
| AICAR                          |    | An activator of AMP-activated protein kinase (AMPK)           | Used for astroglial differentiation from neural stem cells.                                                                      | Astroglial cells: Fig 10; ref 29                                        |
| Alk5i II                       |    | An inhibitor of TGF- $\beta$ RI kinase                        | Used for the conversion of pancreatic progenitors into endocrine cells and $\beta$ -cells.                                       | Endocrine cell and $\beta$ -cells: Fig 19; ref 48                       |
| Apicidin                       |   | An inhibitor of histone deacetylase (HDAC)                    | Used for converting oligodendrocyte precursor cells into neural stem-like cells.                                                 | Neural stem-like cells: Fig 11; ref 31                                  |
| AS8351                         |  | An inhibitor of histone demethylase                           | Used for converting fibroblasts into cardiac cells.                                                                              | Cardiogenesis: Fig 14; ref 38                                           |
| Bay K8644                      |  | An activator of calcium channel                               | Used for converting gastric epithelial cells into endodermal progenitors.                                                        | Endodermal progenitors: Fig 18; ref 46                                  |
| Bexarotene                     |  | An agonist of the retinoic acid X receptor                    | Used for converting myoblasts into adipocytes.                                                                                   | Adipogenesis: Fig 15; ref 41                                            |
| BIO (6-bromoindirubin-3-oxine) |  | An inhibitor of GSK-3 $\beta$                                 | Used for cardiac mesoderm and endoderm induction from pluripotent stem cells.                                                    | Cardiogenesis: Fig 13; refs 35, 36<br>Endoderm: ref 44                  |
| BIX01294                       |  | An inhibitor of histone methyltransferase                     | Used for converting fibroblasts into cardiac cells.<br>Used for converting gastric epithelial cells into endodermal progenitors. | Cardiogenesis: Fig 14; ref 38<br>Endodermal progenitors: Fig 18; ref 46 |
| CCT-018159                     |  | An inhibitor of heat shock protein 90 (Hsp90) ATPase activity | Used for hepatic induction from pluripotent stem cells.                                                                          | Hepatocytes: ref 50                                                     |

CHIR99021

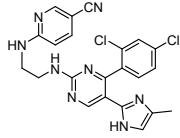

An inhibitor of glycogen synthase kinase 3 $\beta$  (GSK-3 $\beta$ )

Activates the Wnt signaling pathway. Used for the generation of cardiac, skeletal muscle, neuronal and osteocyte cells. Used for endoderm induction from pluripotent stem cells.

Neurogenesis: Figs 7, 9, 12; refs 22, 28, 32, 33  
Schwann cells: ref 30  
Cardiogenesis: Figs 13, 14; refs 35, 36, 37, 38, 39  
Skeletal muscle: ref 40  
Osteogenesis: Fig 16; ref 42  
Endoderm: Figs 19, 20; refs 43, 48, 49

Cyclopamine

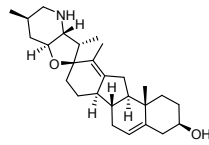

An inhibitor of hedgehog signaling pathway

Used for converting pluripotent stem cells into bone cells.

Osteogenesis: Fig 16; ref 42

DAPT

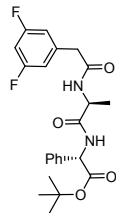

An inhibitor of  $\gamma$ -secretase

Used for converting astrocytes into neuronal cells.

Neurogenesis: Fig 9; ref 28

Dexamethasone

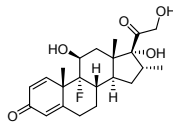

An agonist of glucocorticoid receptor

Used for the modulation of the proliferation and functional maturation of hepatocytes.

Hepatocytes: Fig 20; ref 49

Dihexa

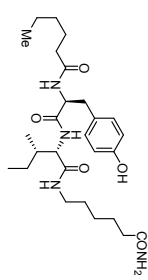

An agonist of hepatocyte growth factor receptor

Used for the functional maturation of hepatocytes.

Hepatocytes: Fig 20; ref 49

Dimehtyl sulfoxide (DMSO)

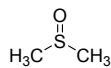

Pleotropic targets

Used for the hepatic specific induction and progenitor generation from the endoderm.

Hepatocytes: Fig 20; ref 49

Dorsomorphin

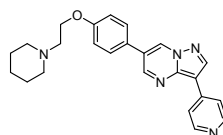

An inhibitor of AMP-activated protein kinase (AMPK)

Used for converting fibroblasts into neuronal cells.

Neurogenesis: Fig 7; ref 22

EX-527

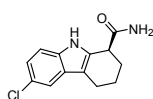

a selective inhibitor of sirtuin 1 (SIRT1)

Used for neuronal differentiation from pluripotent stem cells.

Neurogenesis: Figs 8B and C; ref 26

|                  |                                                                                     |                                                                           |                                                                                                                                                                                                                  |                                                                                    |
|------------------|-------------------------------------------------------------------------------------|---------------------------------------------------------------------------|------------------------------------------------------------------------------------------------------------------------------------------------------------------------------------------------------------------|------------------------------------------------------------------------------------|
| Forskolin        | 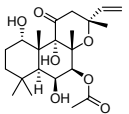   | An activator of adenylate cyclase                                         | Used for converting fibroblasts into neuronal and cardiac cells.<br>Used for converting epidermal neural crest cells to Schwann cells.                                                                           | Neurogenesis: Fig 7; ref 22<br>Schwann cells: ref 30<br>Cardiogenesis: refs 37, 39 |
| GO6983           |    | An inhibitor of protein kinase C (PKC)                                    | Used for converting fibroblasts into neuronal cells.                                                                                                                                                             | Neurogenesis: Fig 7; ref 22                                                        |
| Hh-Ag 1.5        |    | An agonist of smoothened                                                  | Used for converting fibroblasts into neural stem-like cells.                                                                                                                                                     | Neural stem-like cells: Fig 12; ref 33                                             |
| I-BET151         |    | An inhibitor of bromodomain and extra-terminal motif protein (BET) family | Used for converting fibroblasts into neurons.                                                                                                                                                                    | Neurogenesis: ref 23                                                               |
| IDE1             |   | An activator of TGF- $\beta$ signaling pathway                            | Used for converting ESCs into the definitive endoderm.                                                                                                                                                           | Definitive endoderm: Fig 17; ref 45                                                |
| IDE2             |  | An activator of TGF- $\beta$ signaling pathway                            | Used for converting ESCs into the definitive endoderm.                                                                                                                                                           | Definitive endoderm: Fig 17; ref 45                                                |
| (-)-Indolactam V |  | An activator of protein kinase C (PKC)                                    | Used for converting ESCs into the definitive endoderm<br>Used for converting the definitive endoderm into pancreatic progenitors.                                                                                | Pancreatic progenitors: Fig 17; refs 45, 47                                        |
| ISX9             |  | Unknown                                                                   | Used for neuronal differentiation from hippocampal neural progenitor cells (HCNs), P19 cells, and mouse fibroblasts.<br>Accelerates Neurogenesis: through inducing the Ca <sup>2+</sup> influx into the nucleus. | Neurogenesis: Fig 4; refs 18, 23                                                   |
| JNJ10198409      |  | An inhibitor of the platelet-derived growth factor                        | Used for converting fibroblasts into cardiac cells.                                                                                                                                                              | Cardiogenesis: Fig 14; ref 38                                                      |

|                        |                                                                                     |                                                                              |                                                                                                                                                                                                             |                                                                                                                          |
|------------------------|-------------------------------------------------------------------------------------|------------------------------------------------------------------------------|-------------------------------------------------------------------------------------------------------------------------------------------------------------------------------------------------------------|--------------------------------------------------------------------------------------------------------------------------|
| KHS101                 | 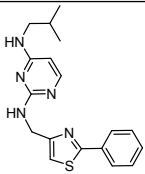   | An inhibitor of transforming acidic coiled-coil containing protein 3 (TACC3) | Used for neural differentiation from hippocampal neural progenitor cells (HCNs).<br>Accelerates neurogenesis through negative regulation of the cell cycle.                                                 | Neurogenesis:<br>Fig 3; ref 17                                                                                           |
| KY0211                 |    | An inhibitor of Wnt signaling pathway                                        | Used for cardiac differentiation from mesoderm.                                                                                                                                                             | Cardiogenesis:<br>Fig 13; ref 36                                                                                         |
| LDN193189              |   | An inhibitor of BMP type 1 receptor ALK2/3                                   | Used for converting astrocytes into neurons.<br>Used for converting fibroblasts into neural stem-like cells.<br>Used for the generation of pancreatic progenitors from definitive endoderm                  | Neurogenesis:<br>Fig 9; ref 28<br>Neural stem-like cells:<br>Fig 12; ref 33<br>Pancreatic progenitors:<br>Fig 19; ref 48 |
| MS-275<br>(Entinostat) |  | An inhibitor of histone deacetylase (HDAC)                                   | Used for converting oligodendrocyte precursor cells into neural stem-like cells.                                                                                                                            | Neural stem-like cells:<br>Fig 11; ref 31                                                                                |
| Neurodazine<br>(Nz)    |  | Unknown                                                                      | Used for neuronal differentiation from myoblasts, pluripotent stem cells, NIH3T3 fibroblasts and neuroblastoma cells.<br>Accelerates neuronal differentiation by activating Wnt and Shh signaling pathways. | Neurogenesis:<br>Figs 5, 6, 8A;<br>refs 7, 13, 21, 25                                                                    |
| Neurodazole<br>(Nzl)   |  | Unknown                                                                      | Used for neuronal differentiation from pluripotent stem cells, NIH3T3 fibroblasts and neuroblastoma cells.<br>Induces neuronal differentiation by activating Wnt and Shh signaling pathways.                | Neurogenesis:<br>Fig 6, refs 13, 21<br>Fig 8A; ref 25                                                                    |
| Neuropathiazol         |  | Unknown                                                                      | Used for neuronal differentiation from hippocampal neural progenitor cells (HCNs).                                                                                                                          | Neurogenesis:<br>Fig 2; ref 16                                                                                           |
| OAC2                   |  | An activator of pluripotency factor Oct4                                     | Used for converting fibroblasts into cardiac cells.                                                                                                                                                         | Cardiogenesis:<br>Fig 14; ref 38                                                                                         |
| Parnate                |  | An inhibitor of histone demethylase                                          | Used for converting fibroblasts into neuronal stem-like and cardiac cells.                                                                                                                                  | Neural stem-like cells:<br>Fig 12; ref 33<br>Cardiogenesis:<br>refs 37, 39                                               |

|               |                                                                                     |                                                 |                                                                                                                                                                                                                                                                                                             |                                                                                                                            |
|---------------|-------------------------------------------------------------------------------------|-------------------------------------------------|-------------------------------------------------------------------------------------------------------------------------------------------------------------------------------------------------------------------------------------------------------------------------------------------------------------|----------------------------------------------------------------------------------------------------------------------------|
| PDBu          | 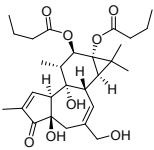   | An activator of PKC                             | Used for the generation of pancreatic progenitors from definitive endoderm,                                                                                                                                                                                                                                 | Pancreatic progenitors: Fig 19; ref 48                                                                                     |
| Purmorphamine |    | An agonist for smoothened                       | Used for converting astrocytes into neuronal cells.                                                                                                                                                                                                                                                         | Neurogenesis: Fig 9; ref 28                                                                                                |
| Repsox        |    | An inhibitor of the TGF-β type 1 receptor ALK5  | Used for converting fibroblasts into neural and cardiac cells.<br>Used for the conversion of fibroblasts into neural progenitors.                                                                                                                                                                           | Neurogenesis: Fig 7; ref 22<br>Neural progenitors: ref 32<br>Cardiogenesis: ref 39                                         |
| Retinoic acid |   | An activator of retinoic signaling pathway      | A well-known Neurogenesis: inducer<br>Used for converting epidermal neural crest cells into Schwann cells.<br>Used for converting fibroblasts into neural stem-like cells.<br>Used for generation of pancreatic progenitors from definitive endoderm, pancreatic maturation and endocrine cells generation. | Schwann cells: ref 30<br>Neural stem-like cells: Fig 12; ref 33<br>Pancreatic progenitors & endocrine cell: Fig 19; ref 48 |
| RG108         |  | An inhibitor of DNA methyltransferase           | Used for converting fibroblasts into neural stem-like cells and cardiac cells.<br>Used for converting gastric epithelial cells into endodermal progenitors.                                                                                                                                                 | Neural stem-like cells: Fig 12; ref 33<br>Endodermal progenitors: Fig 18; ref 46                                           |
| SAG           |  | A smoothened agonist                            | Used for converting astrocytes into neuronal cells.<br>Used for converting pluripotent stem cells into bone cells.<br>Activates hedgehog signaling pathway.                                                                                                                                                 | Neurogenesis: Fig 9; ref 28<br>Osteogenesis: Fig 16; ref 42                                                                |
| SANT1         |  | A smoothened antagonist                         | Used for the generation of pancreatic progenitors from definitive endoderm, pancreatic maturation and endocrine cell generation.                                                                                                                                                                            | Pancreatic progenitors & endocrine cells: Fig 19; ref 48                                                                   |
| SB431542      |  | An inhibitor of TGF-β/activin signaling pathway | Used for converting astrocytes into neurons.<br>Used for converting epidermal neural crest cells to Schwann cells.<br>Used for the conversion of fibroblasts into cardiomyocytes.<br>Used for gastric epithelial cell reprogramming to endodermal progenitors.                                              | Neurogenesis: Fig 9; ref 28<br>Schwann cells: ref 30<br>Cardiogenesis: ref 37<br>Endodermal progenitor: Fig 18; ref 46     |

|                         |                                                                                     |                                                      |                                                                                                                                                            |                                                                         |
|-------------------------|-------------------------------------------------------------------------------------|------------------------------------------------------|------------------------------------------------------------------------------------------------------------------------------------------------------------|-------------------------------------------------------------------------|
| SC1                     | 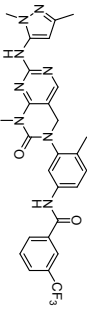   | A dual inhibitor of Ras-GAP and ERK1                 | Used for converting fibroblasts into cardiac cells                                                                                                         | Cardiogenesis:<br>Fig 14; ref 38                                        |
| SMER28                  |    | An inhibitor of DNA methyltransferases               | Used for converting fibroblasts into neural stem-like cells.                                                                                               | Neural stem-like cells:<br>Fig 12; ref 33                               |
| SP600125                |    | An inhibitor of c-Jun N-terminal kinase (JNK)        | Used for converting fibroblasts into neuronal cells.                                                                                                       | Neurogenesis:<br>Fig 7; ref 22                                          |
| SU16F                   |    | An inhibitor of the platelet-derived growth factor   | Used for converting fibroblasts into cardiac cells.                                                                                                        | Cardiogenesis:<br>Fig 14; ref 38                                        |
| TH                      |  | Helioxanthin-derivative                              | Used for converting pluripotent stem cells into bone cells.                                                                                                | Osteogenesis:<br>Fig 16; ref 42                                         |
| Thiazovivin             |  | An inhibitor of Rho-associated protein kinase (ROCK) | Used for converting astrocytes into neuronal cells                                                                                                         | Neurogenesis:<br>Fig 9; ref 28                                          |
| TSA<br>(Trichostatin A) |  | An inhibitor of histone deacetylase (HDAC)           | Used for converting oligodendrocyte precursor cells into neural stem-like cells.                                                                           | Neural stem-like cells:<br>Fig 11; ref 31                               |
| TTNPB                   |  | An agonist of retinoic acid receptor                 | Used for converting astrocytes into neurons.<br>Used for converting fibroblasts into cardiac cells                                                         | Neurogenesis:<br>Fig 9; ref 28<br>Cardiogenesis:<br>ref 39              |
| TWS119                  |  | An inhibitor of glycogen synthase kinase 3β (GSK-3β) | Activates the Wnt signaling pathway<br>Used for neuronal differentiation from pluripotent stem cells.                                                      | Neurogenesis:<br>Fig 2; ref 15                                          |
| Valproic acid<br>(VPA)  |  | An inhibitor of histone deacetylase (HDAC)           | Used for converting fibroblasts into neuronal and cardiac cells as well as neural progenitor cells.<br>Used for converting astrocytes into neuronal cells. | Neurogenesis:<br>Figs 7, 9; refs 22, 28, 32<br>Cardiogenesis:<br>ref 39 |
| XAV939                  |  | An inhibitor of Wnt signaling pathway                | Used for cardiac differentiation from mesoderm.                                                                                                            | Cardiogenesis:<br>Fig 13; ref 36                                        |



---

XXI

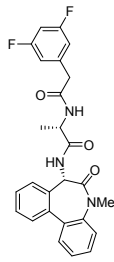

An inhibitor of  $\gamma$ -secretase

Used for endocrine cell generation from pancreatic progenitors.

Endocrine cells:  
Fig 19; ref 48

Y-27632

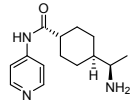

An inhibitor of Rho-associated protein kinase (ROCK)

Used for converting fibroblasts into neuronal and cardiac cells.

Neurogenesis:  
Fig 7; ref 22  
Cardiogenesis:  
Fig 14; ref 38

---

<sup>a</sup>refs in the text.
